# Supplementary material for: Iodine-catalyzed three component reaction: a novel synthesis of 2-aryl-imidazo[1,2-a]pyridine scaffolds
Source: Royal Society of Chemistry journal article supplement (doi:10.1039/c3ra43407a), 2013-01-01
Supplement: c3ra43407a.pdf [file c3ra43407a.pdf]

## Iodine-catalyzed three component reaction; A novel synthesis of 2-aryl-imidazo[1,2-*a*]pyridine scaffolds

Kallimeledoddi. Boregowda Puttaraju, Kalegowda. Shivashankar\*  
P.G. Department of Chemistry, Central College Campus, Bangalore University,  
Bangalore- 560 001, Karnataka, India.

\*Corresponding author. Tel.: +9180 22961249. *E.mail address:* [shivashankark@gmail.com](mailto:shivashankark@gmail.com)

### *Supporting information*

| Entry | Compounds | Spectra                            |
|-------|-----------|------------------------------------|
| S1    | 2a        | <sup>1</sup> H and <sup>13</sup> C |
| S2    | 2b        | <sup>1</sup> H and <sup>13</sup> C |
| S3    | 2c        | <sup>1</sup> H and <sup>13</sup> C |
| S4    | 2d        | <sup>1</sup> H and <sup>13</sup> C |
| S5    | 2e        | <sup>1</sup> H and <sup>13</sup> C |
| S6    | 2f        | <sup>1</sup> H and <sup>13</sup> C |
| S7    | 2g        | <sup>1</sup> H and <sup>13</sup> C |
| S8    | 2h        | <sup>1</sup> H and <sup>13</sup> C |
| S9    | 2i        | <sup>1</sup> H and <sup>13</sup> C |
| S10   | 2j        | <sup>1</sup> H and <sup>13</sup> C |
| S11   | 2k        | <sup>1</sup> H and <sup>13</sup> C |
| S12   | 2l        | <sup>1</sup> H and <sup>13</sup> C |
| S13   | 2m        | <sup>1</sup> H and <sup>13</sup> C |
| S14   | 2n        | <sup>1</sup> H and <sup>13</sup> C |
| S15   | 2a        | LC-MS                              |
| S16   | 2d        | D <sub>2</sub> O exchange          |

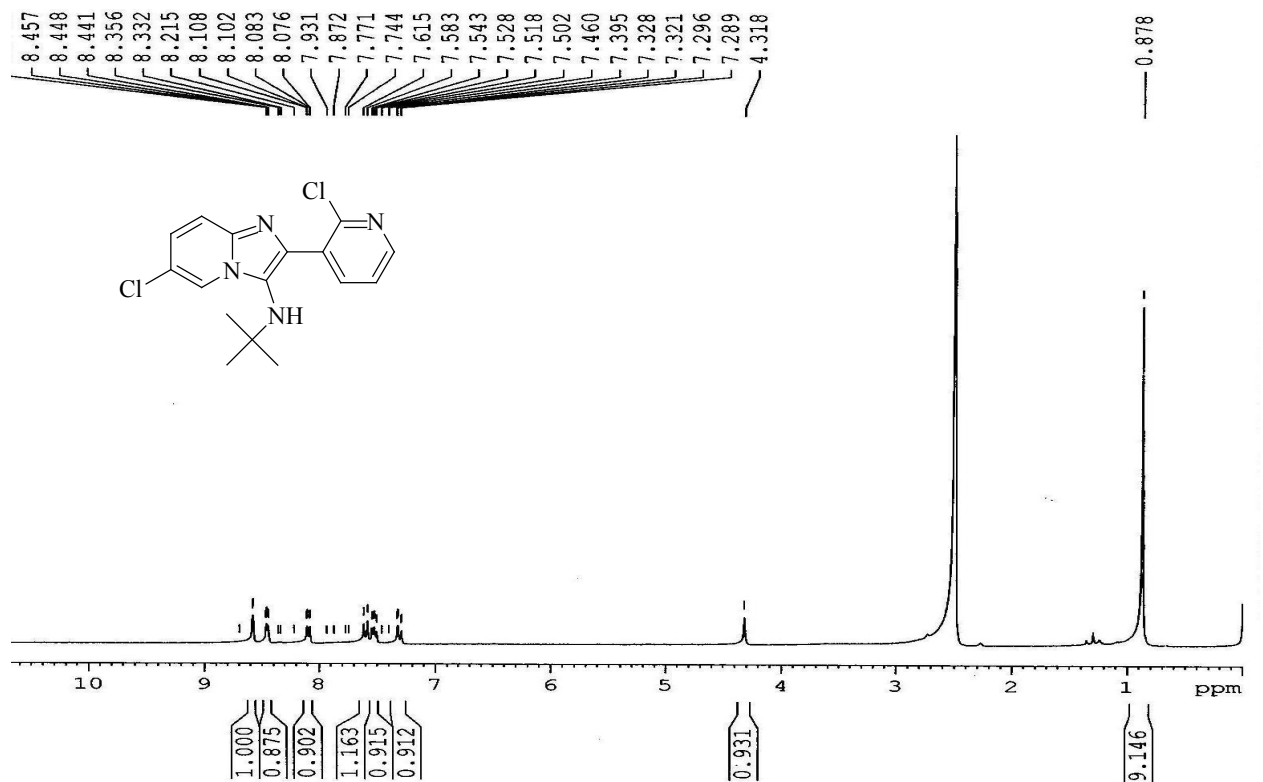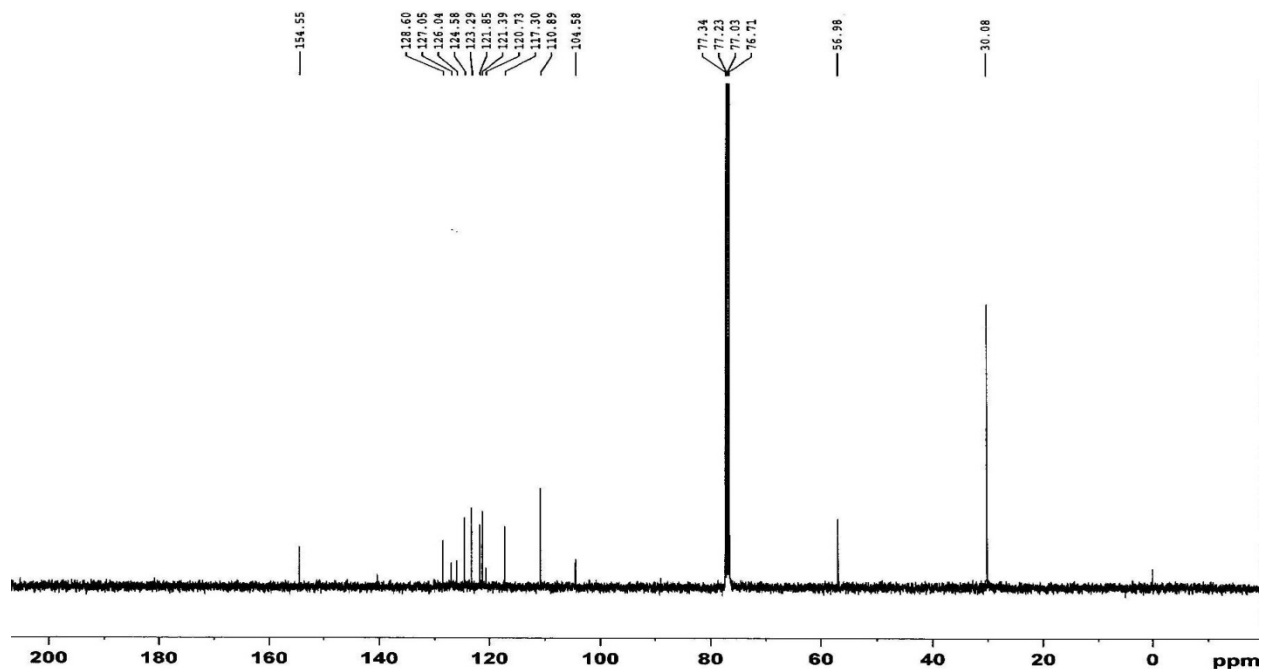

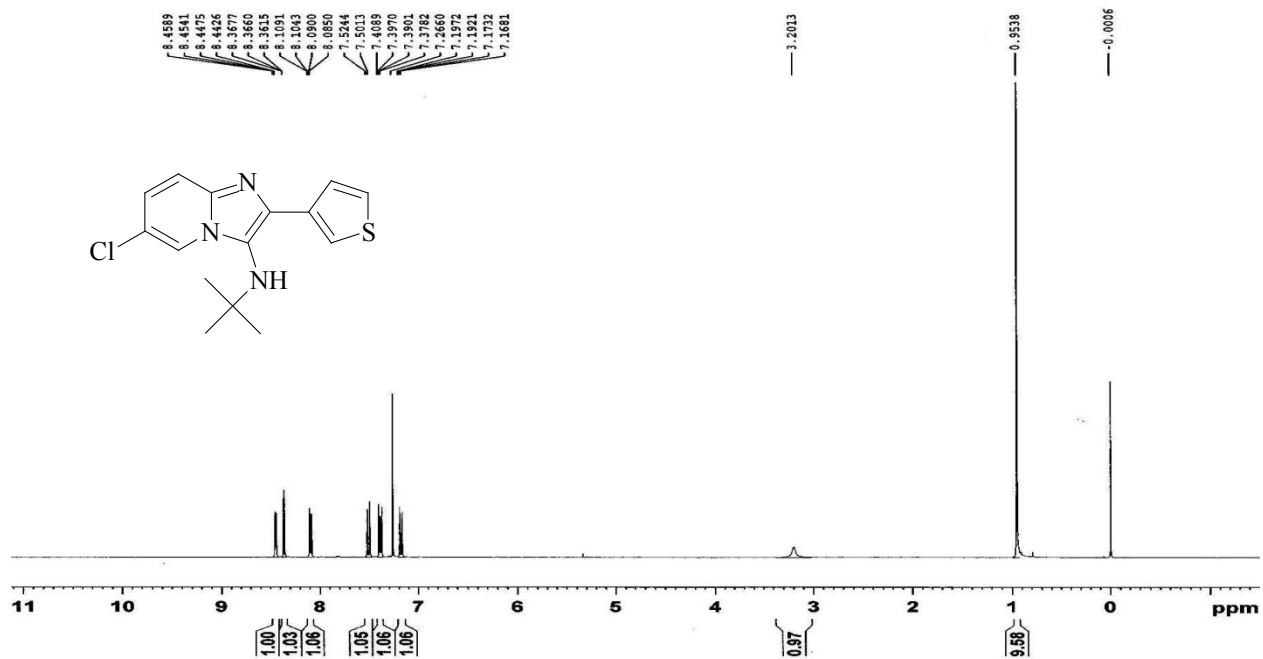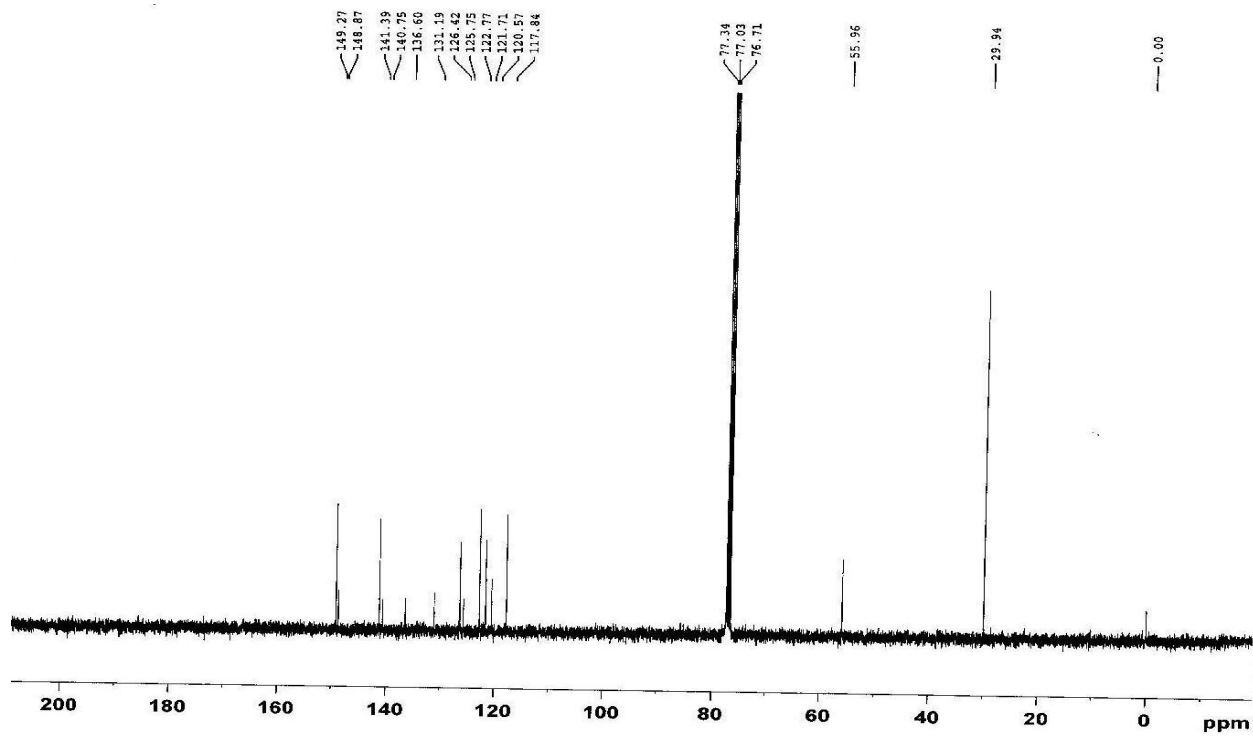

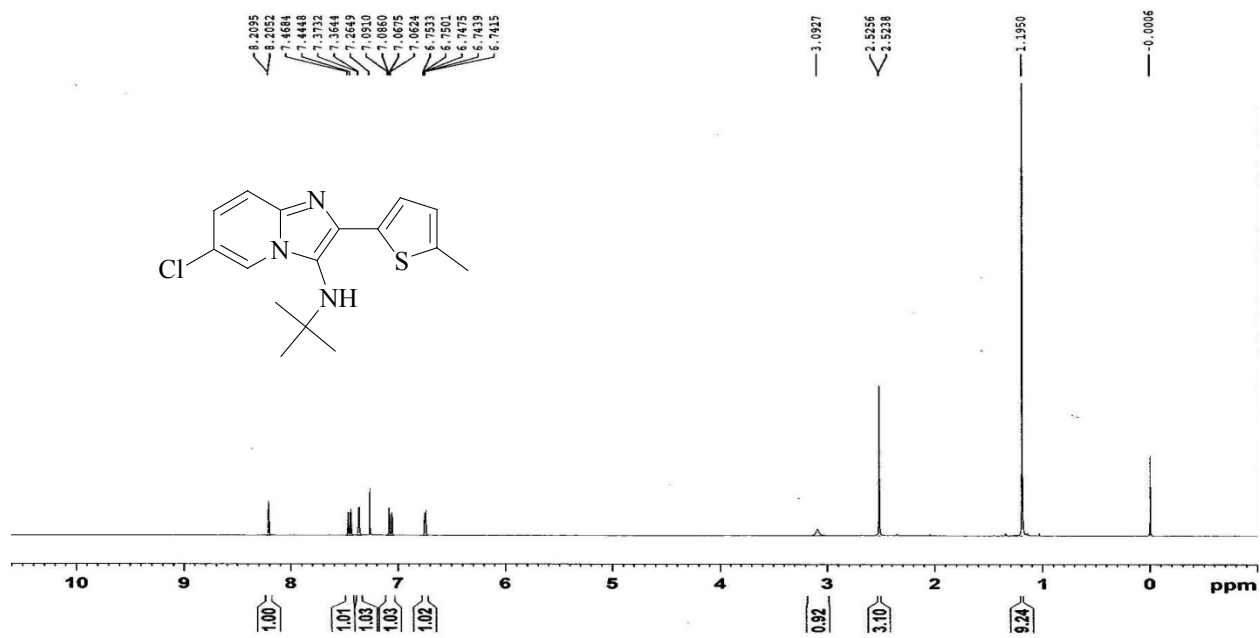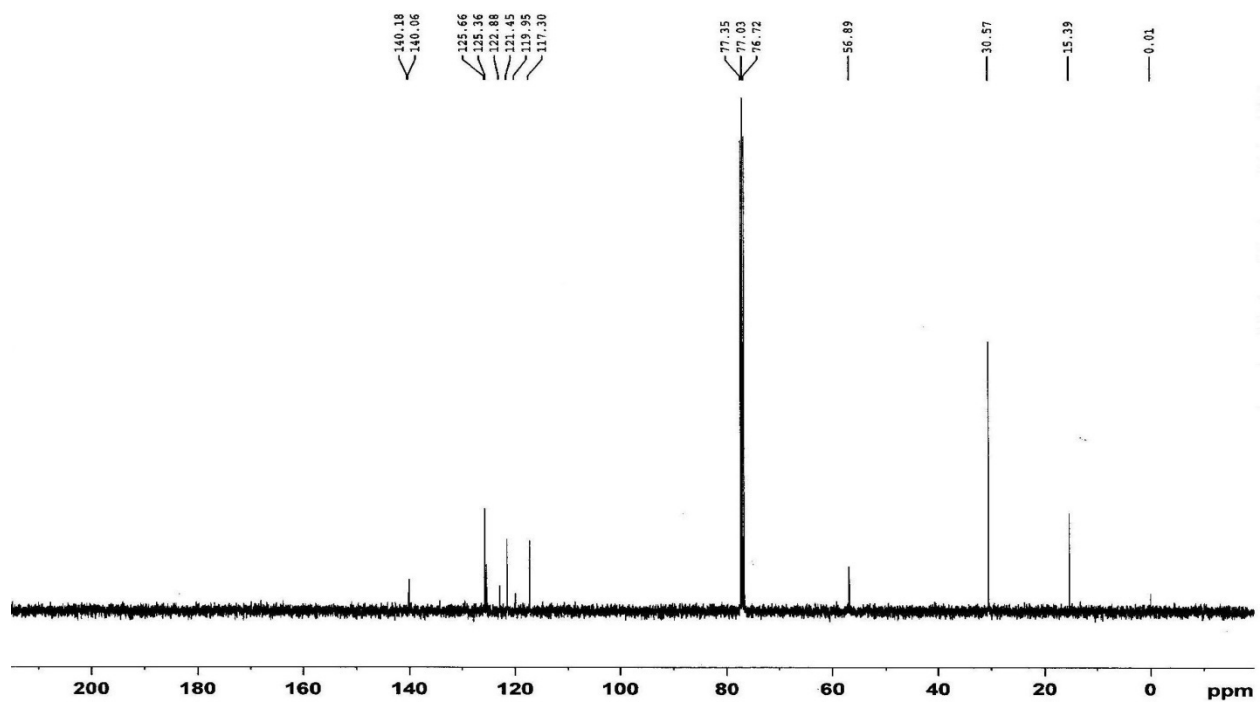

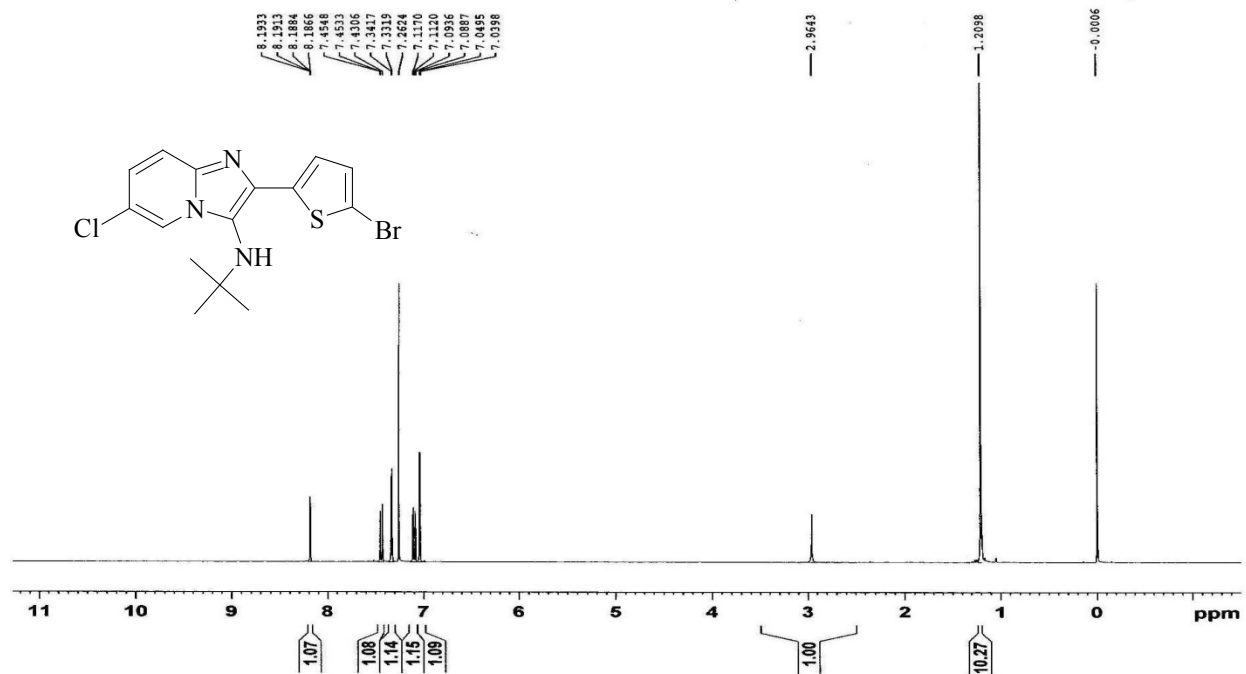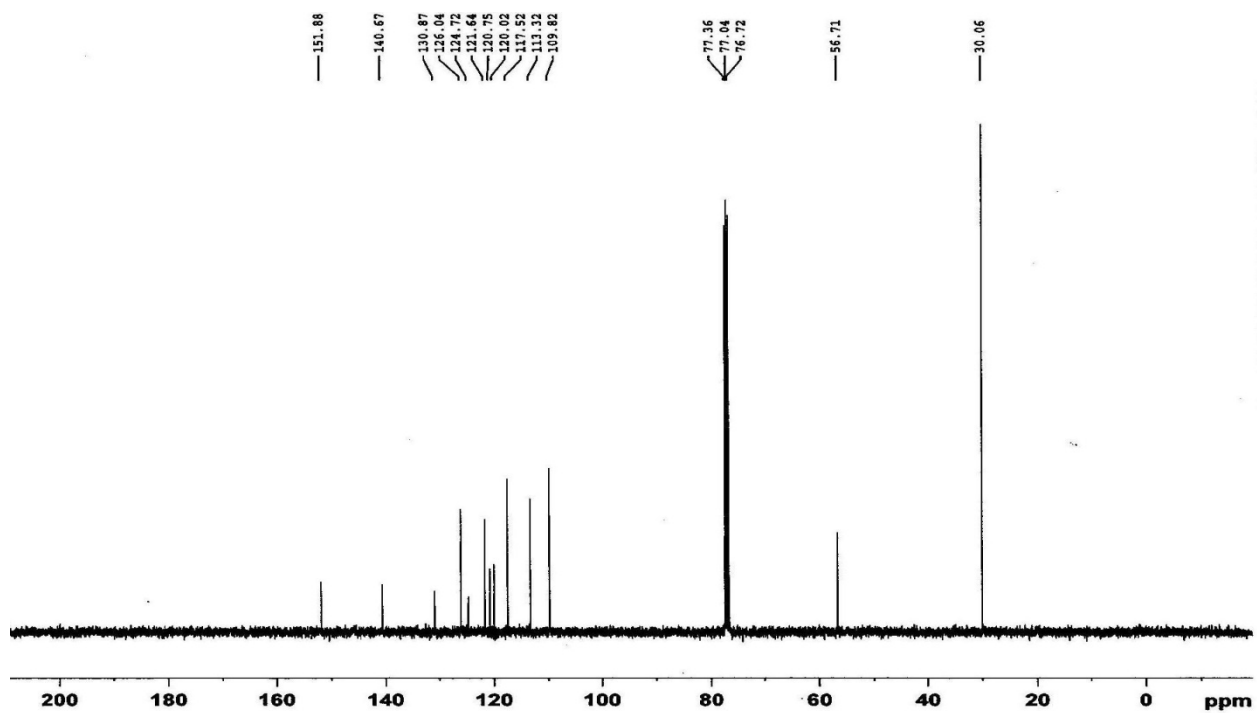

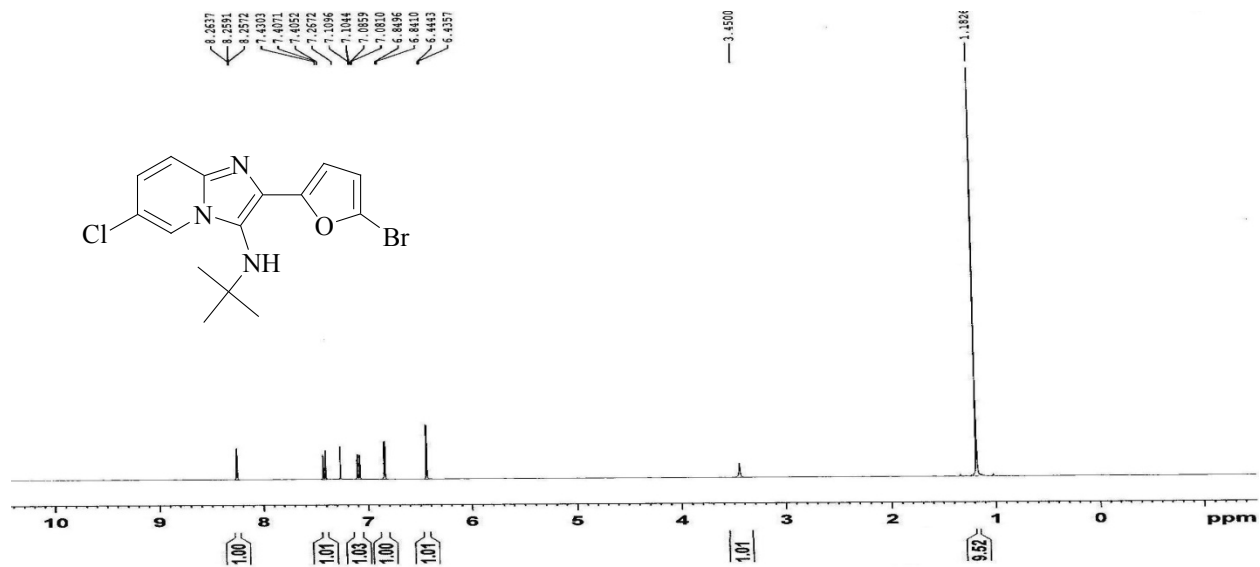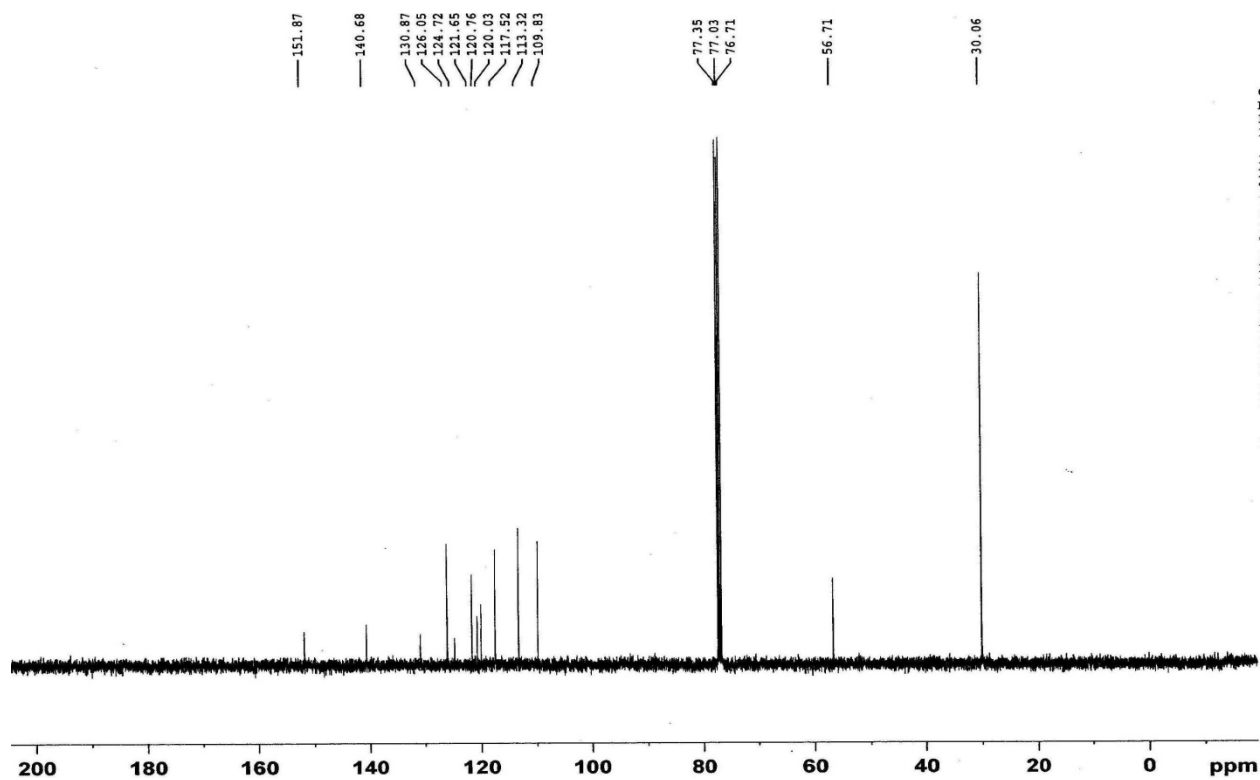

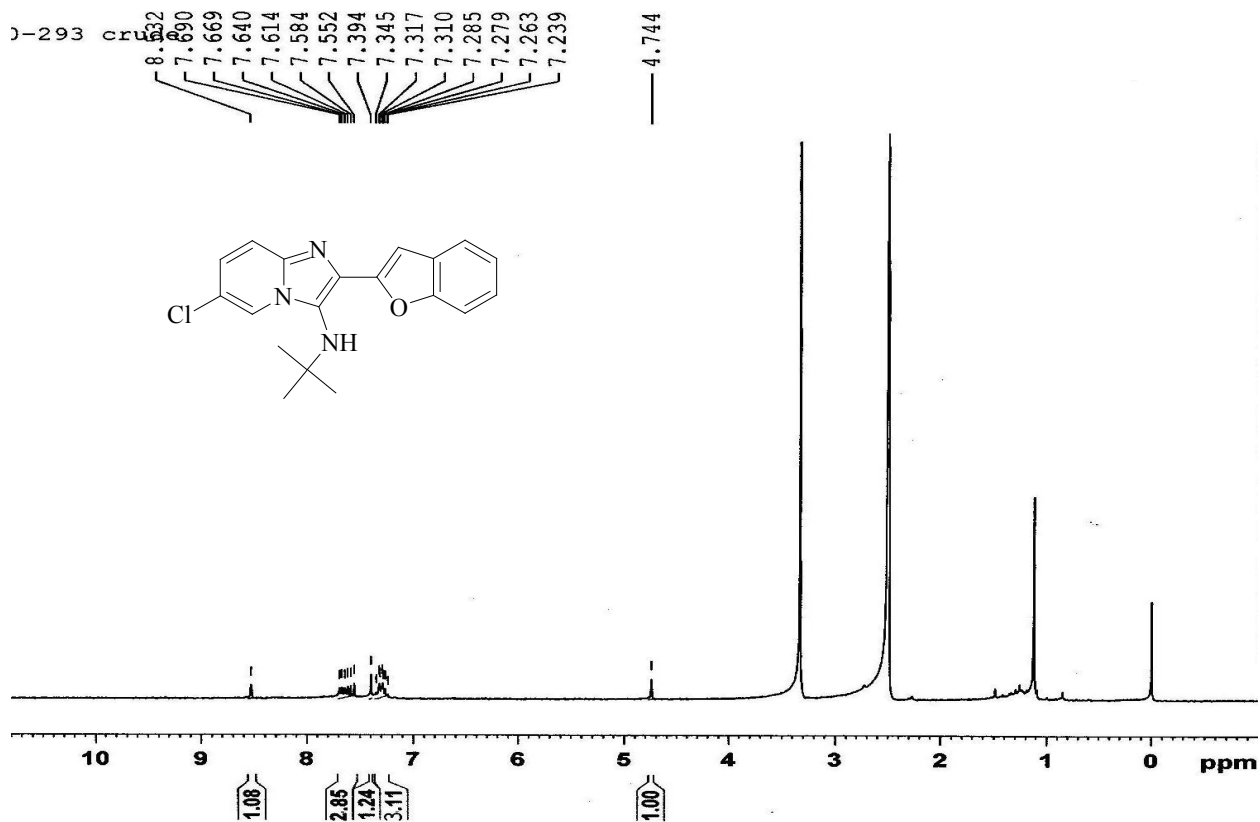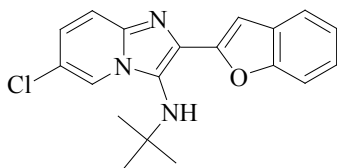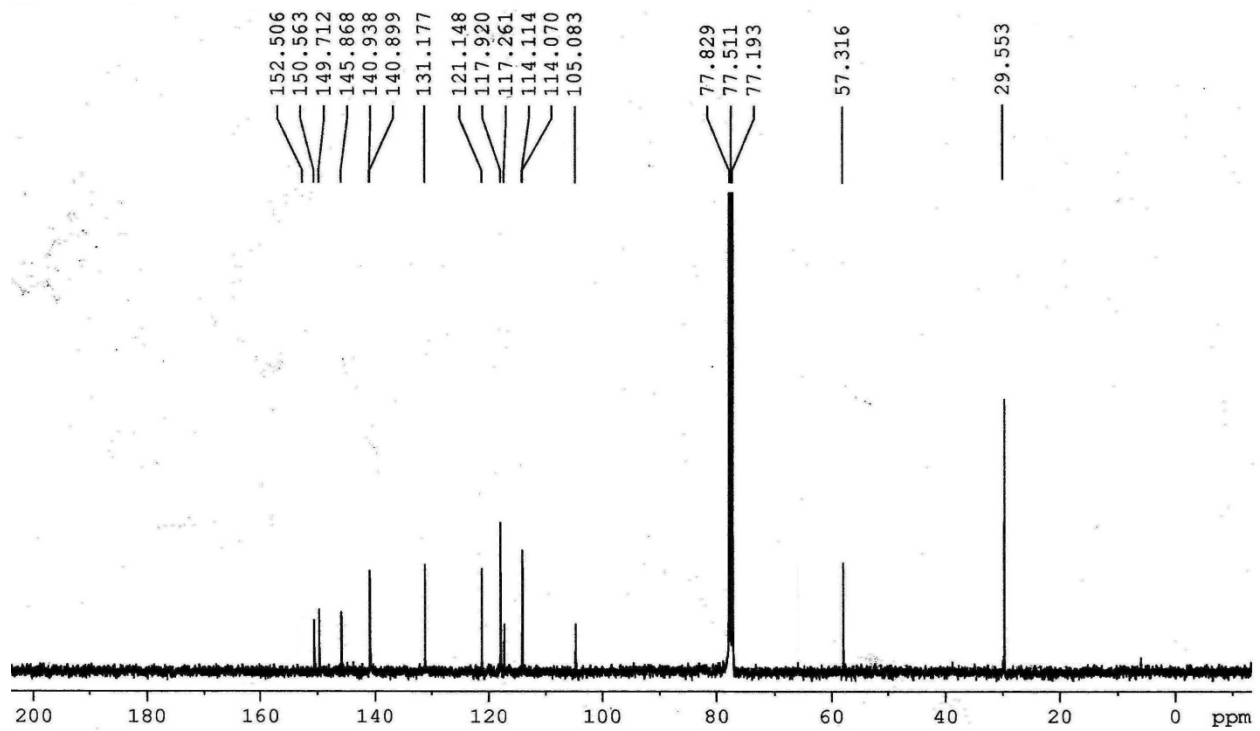

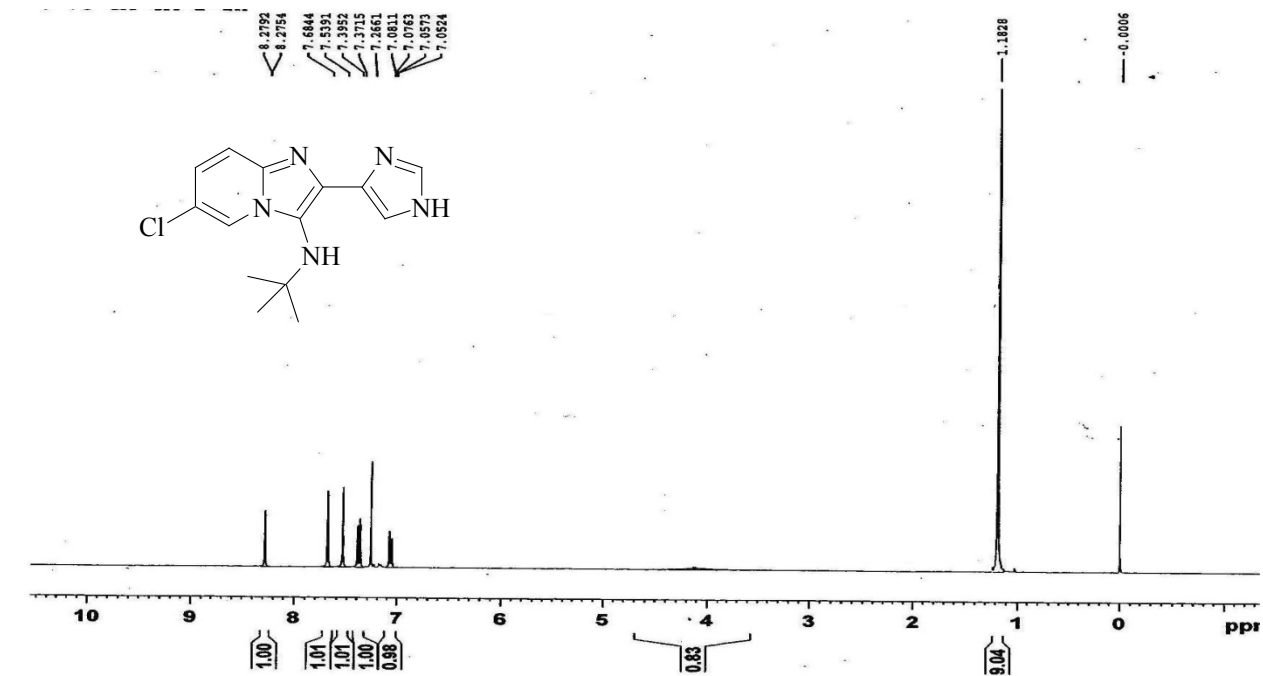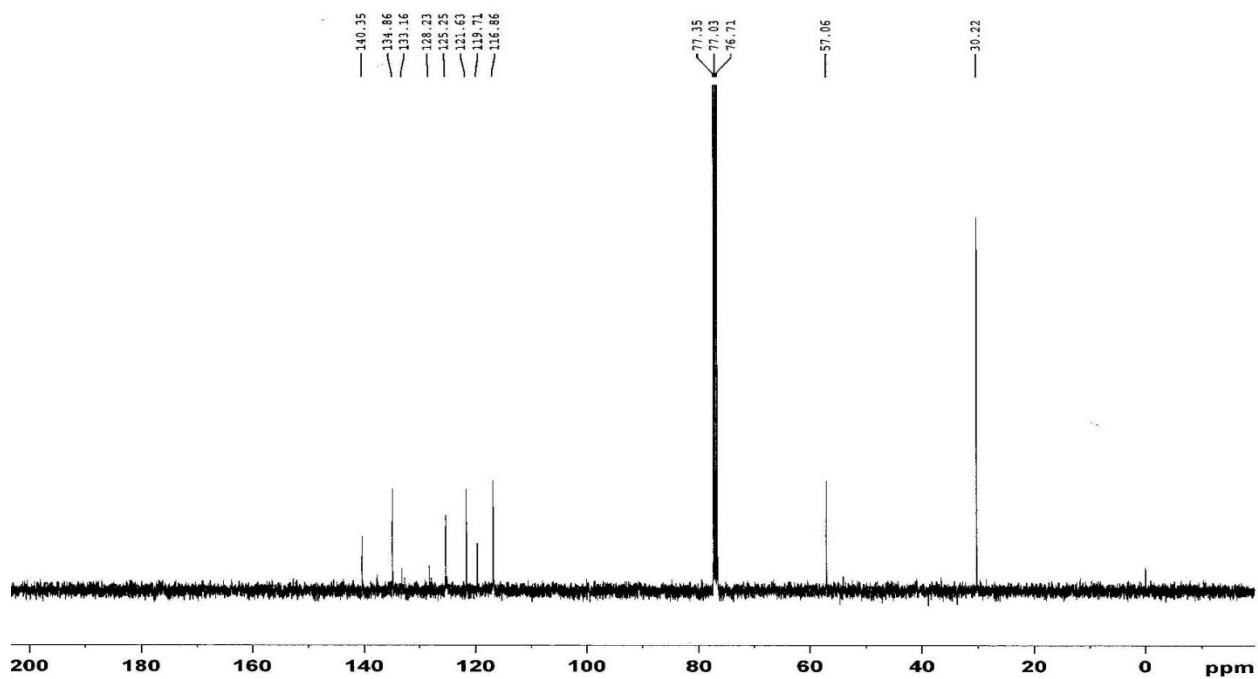



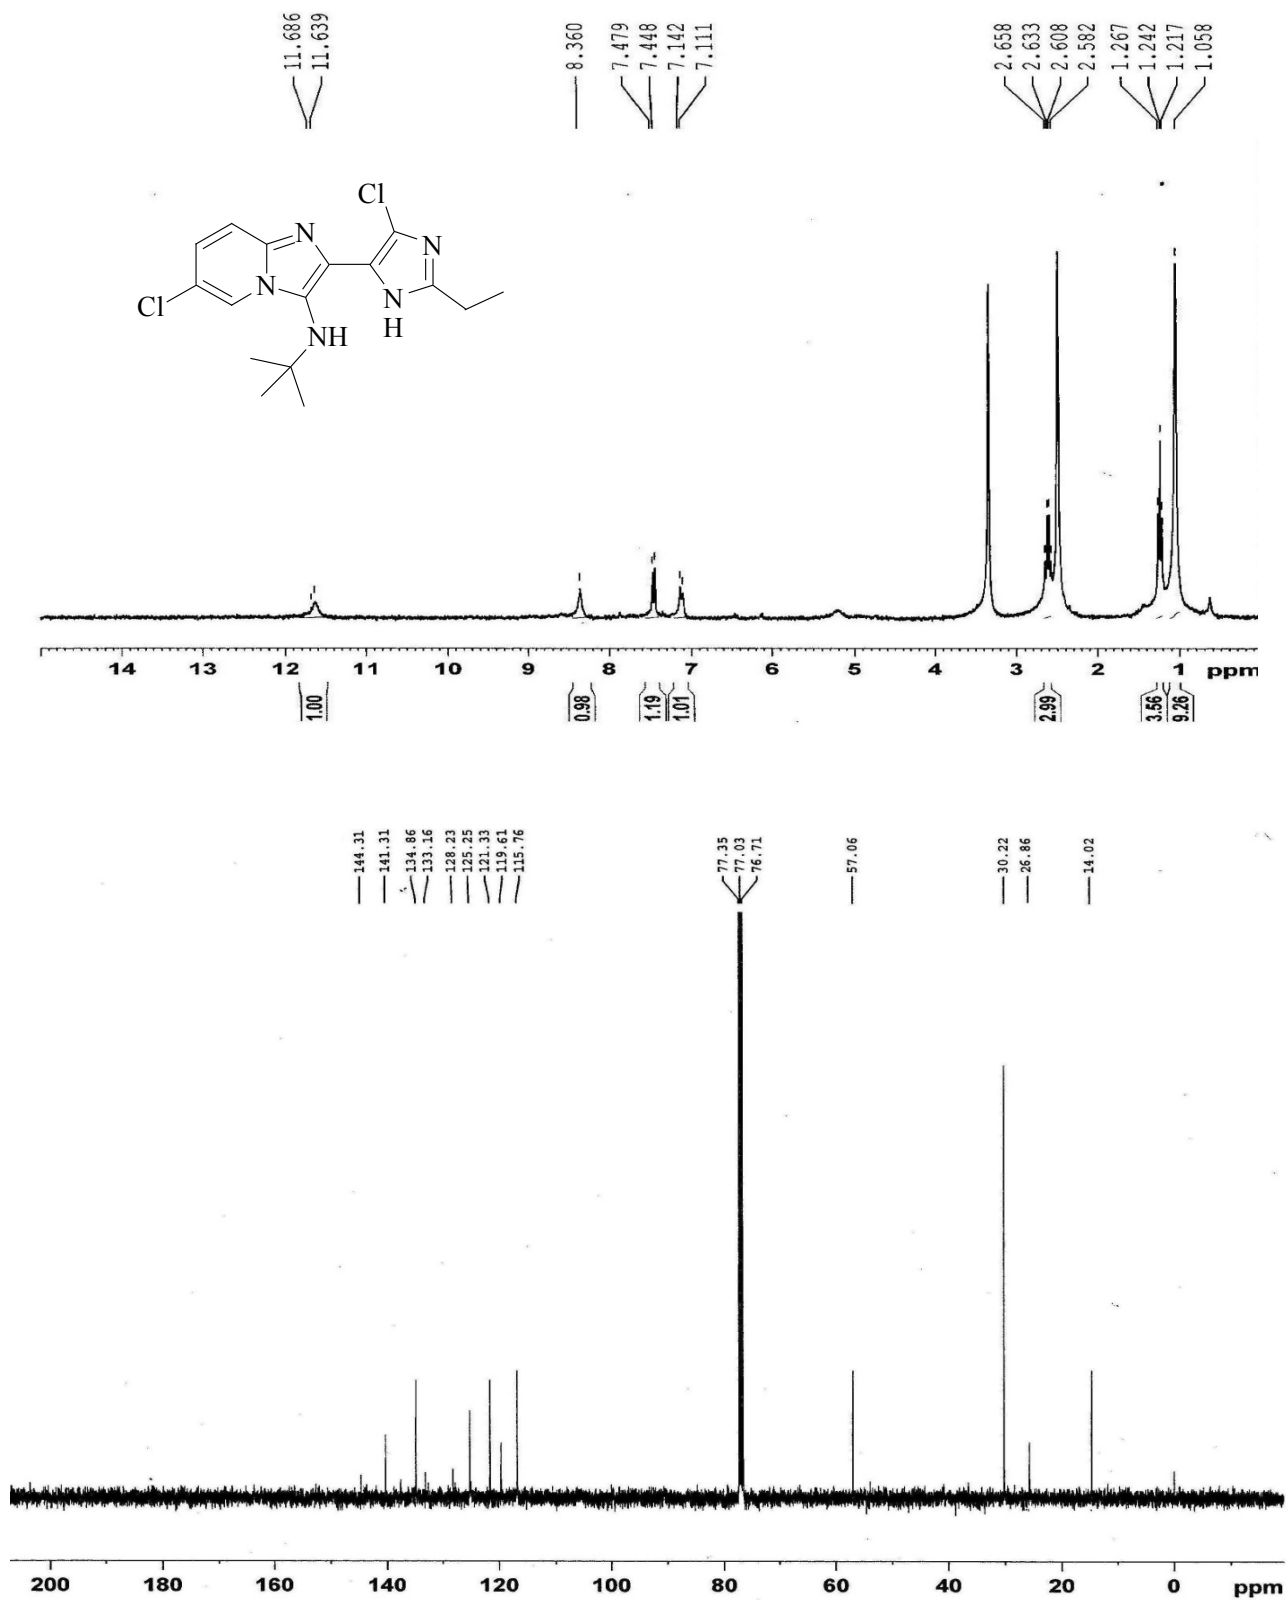

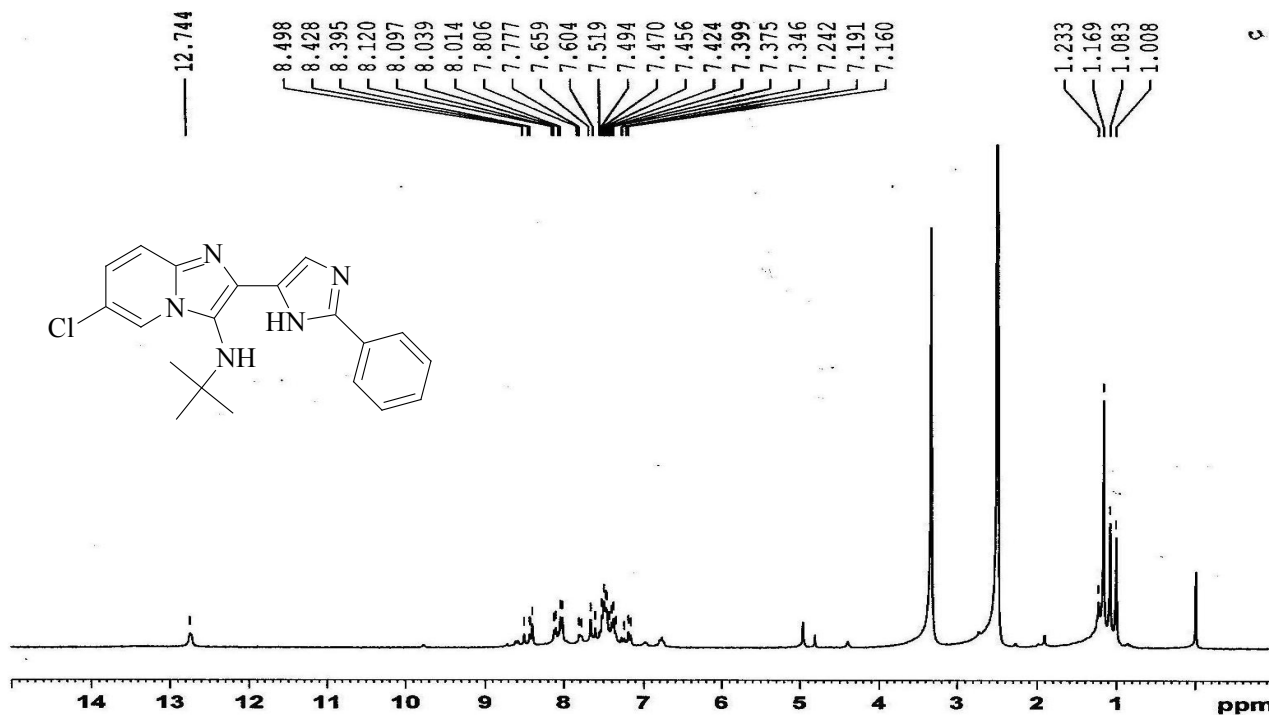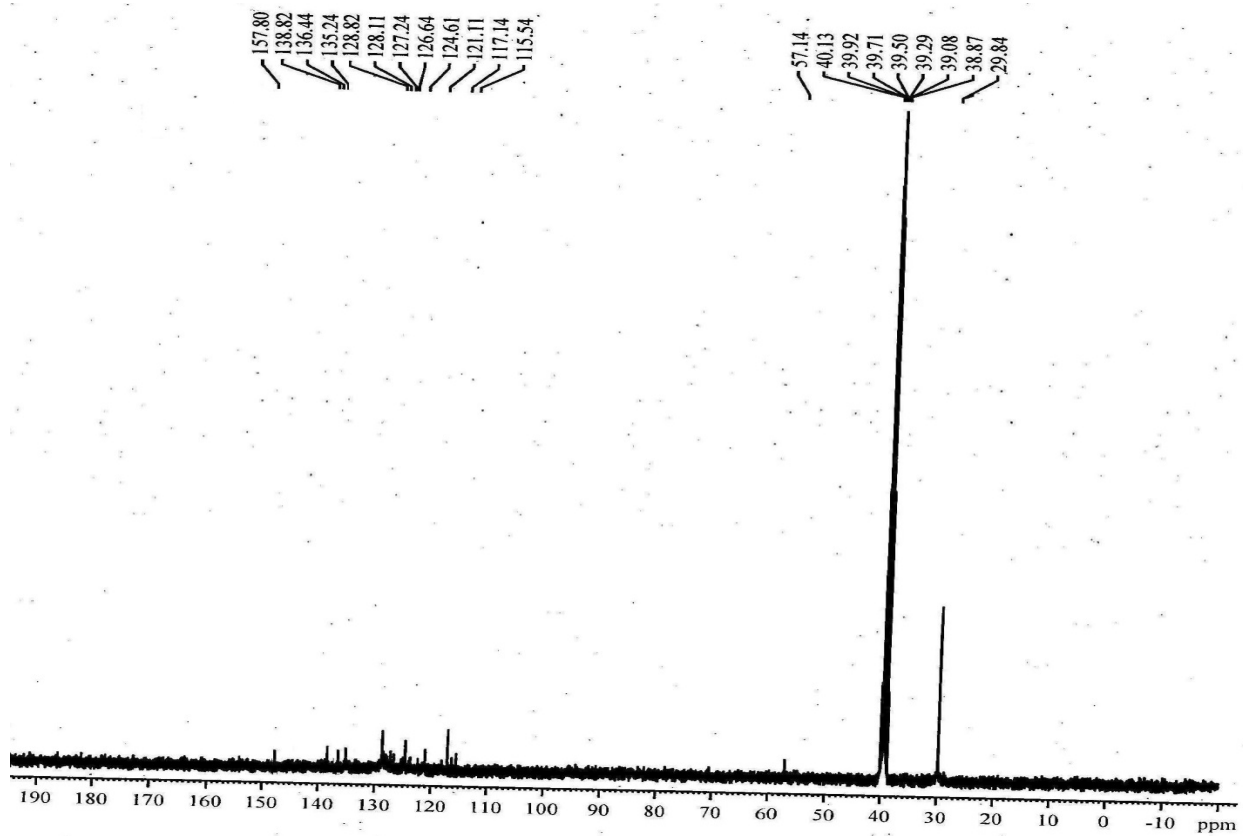

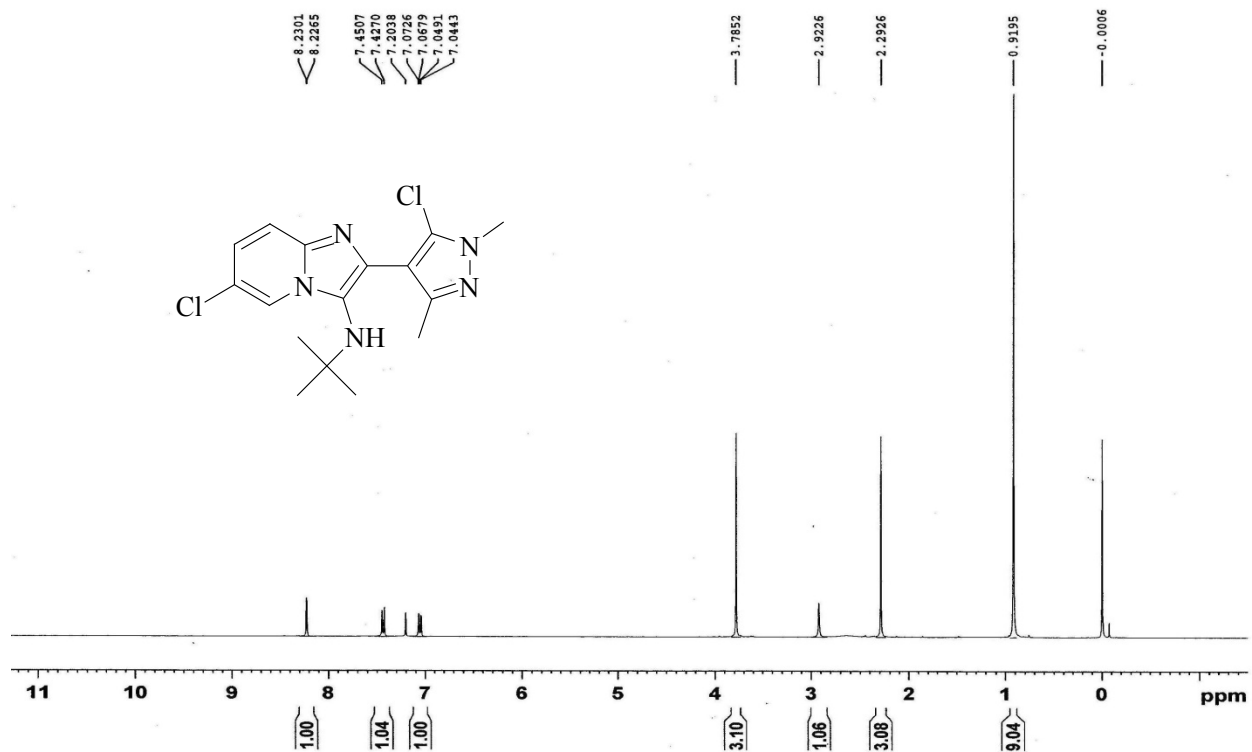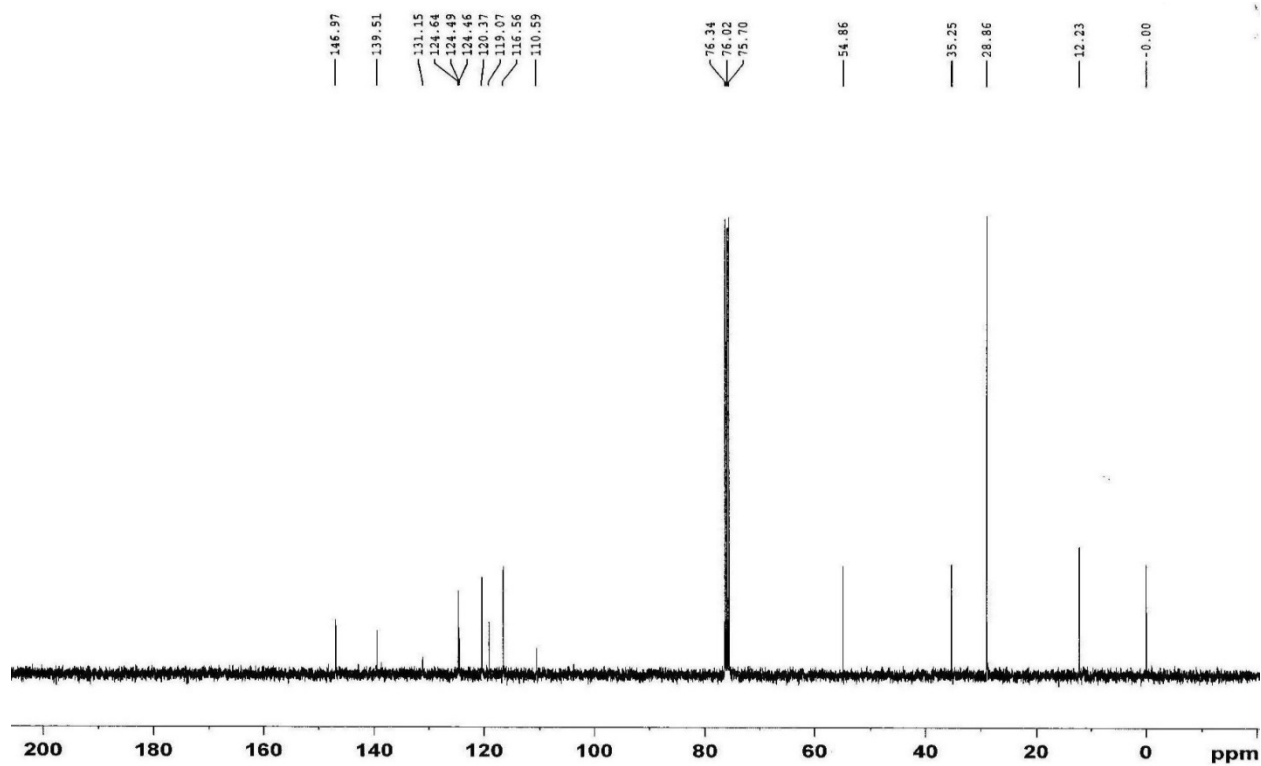

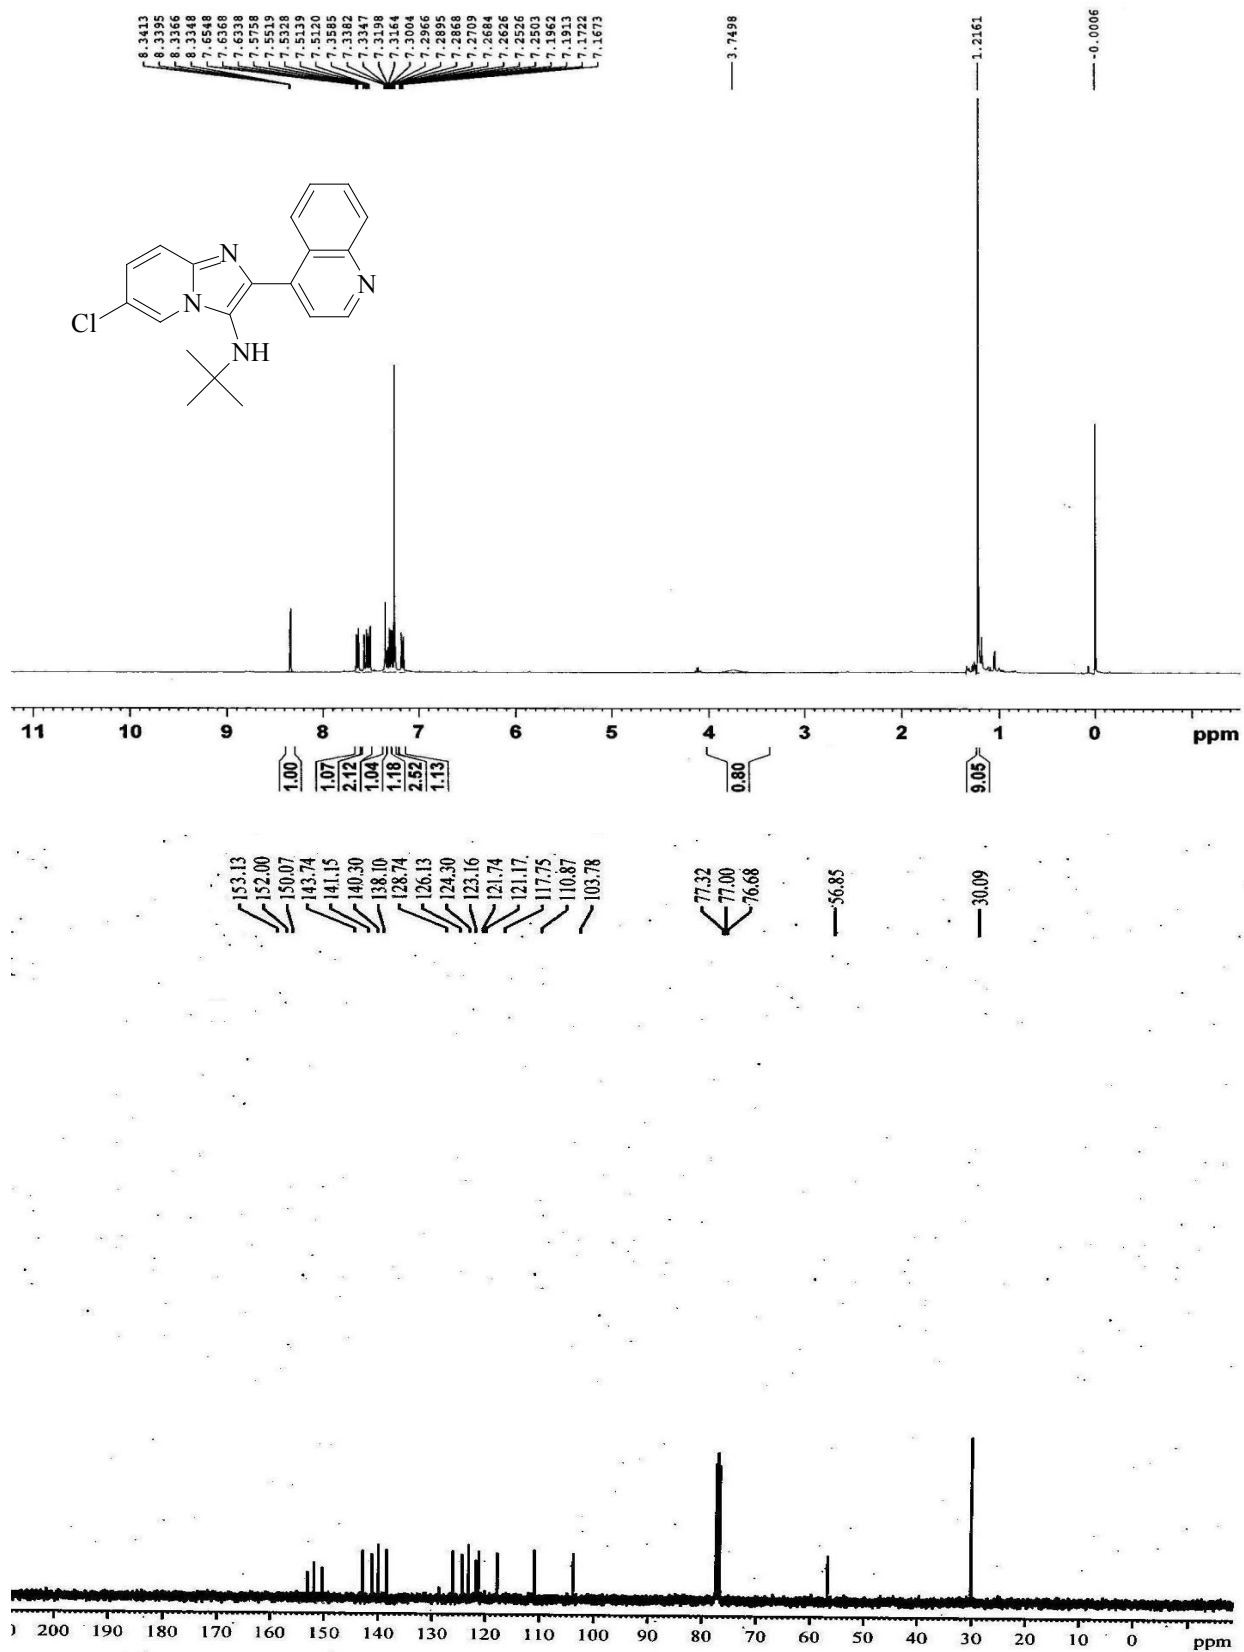

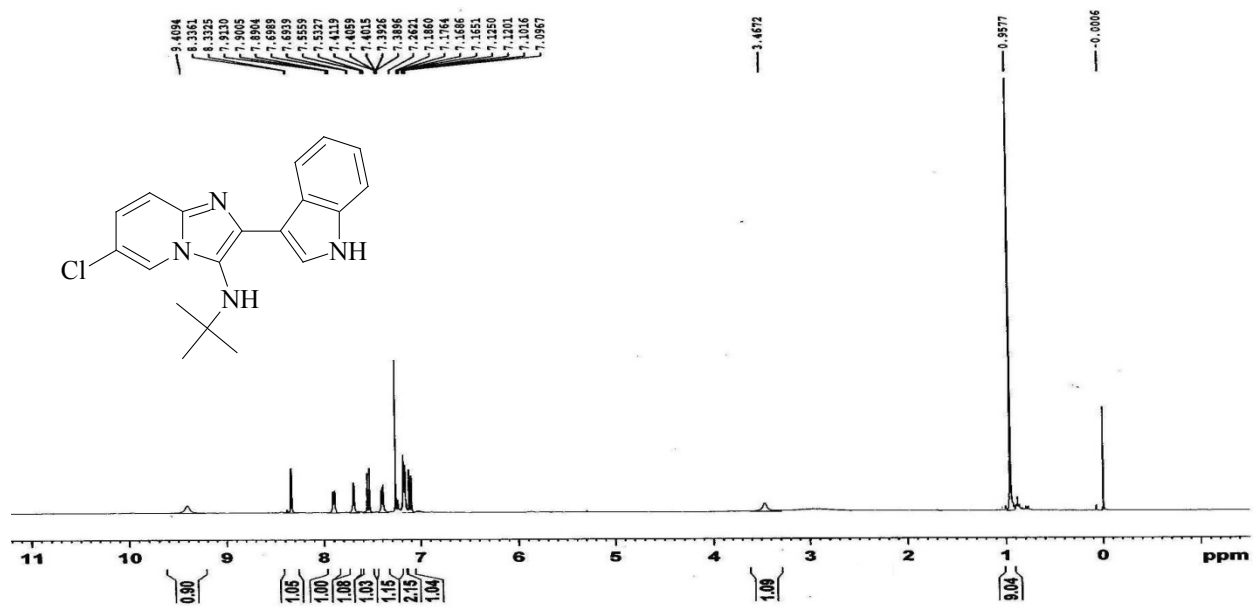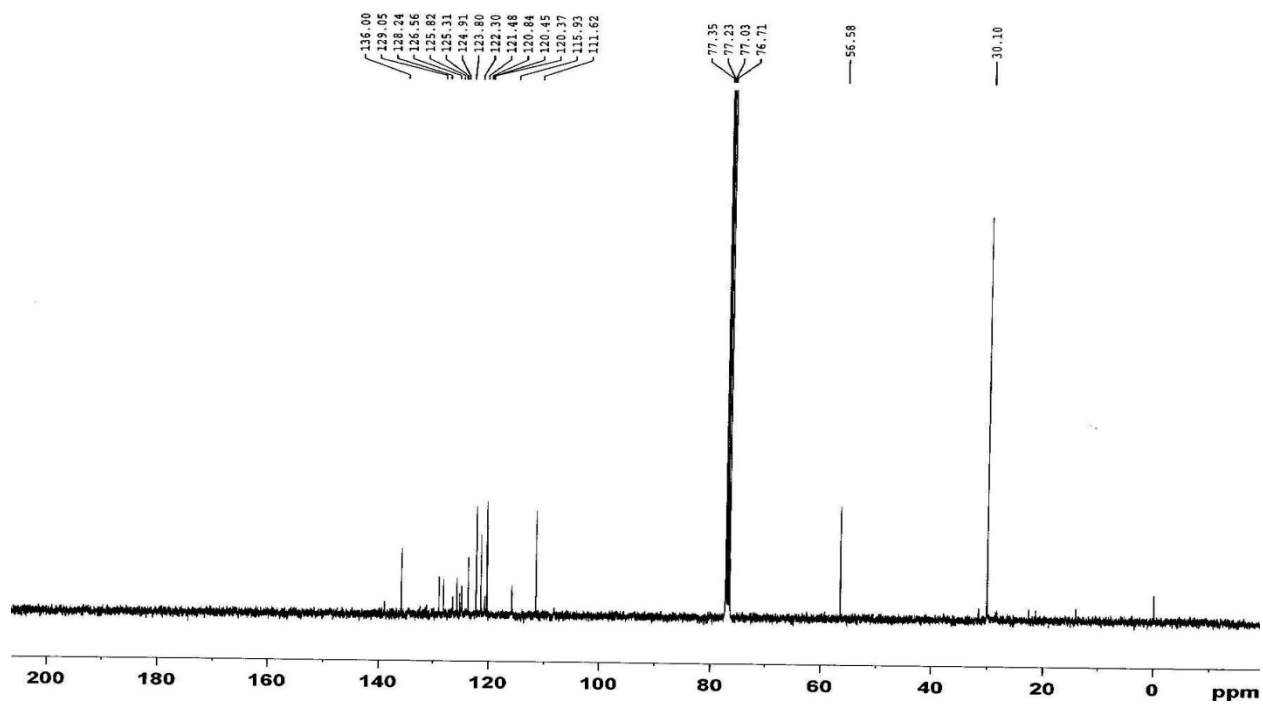

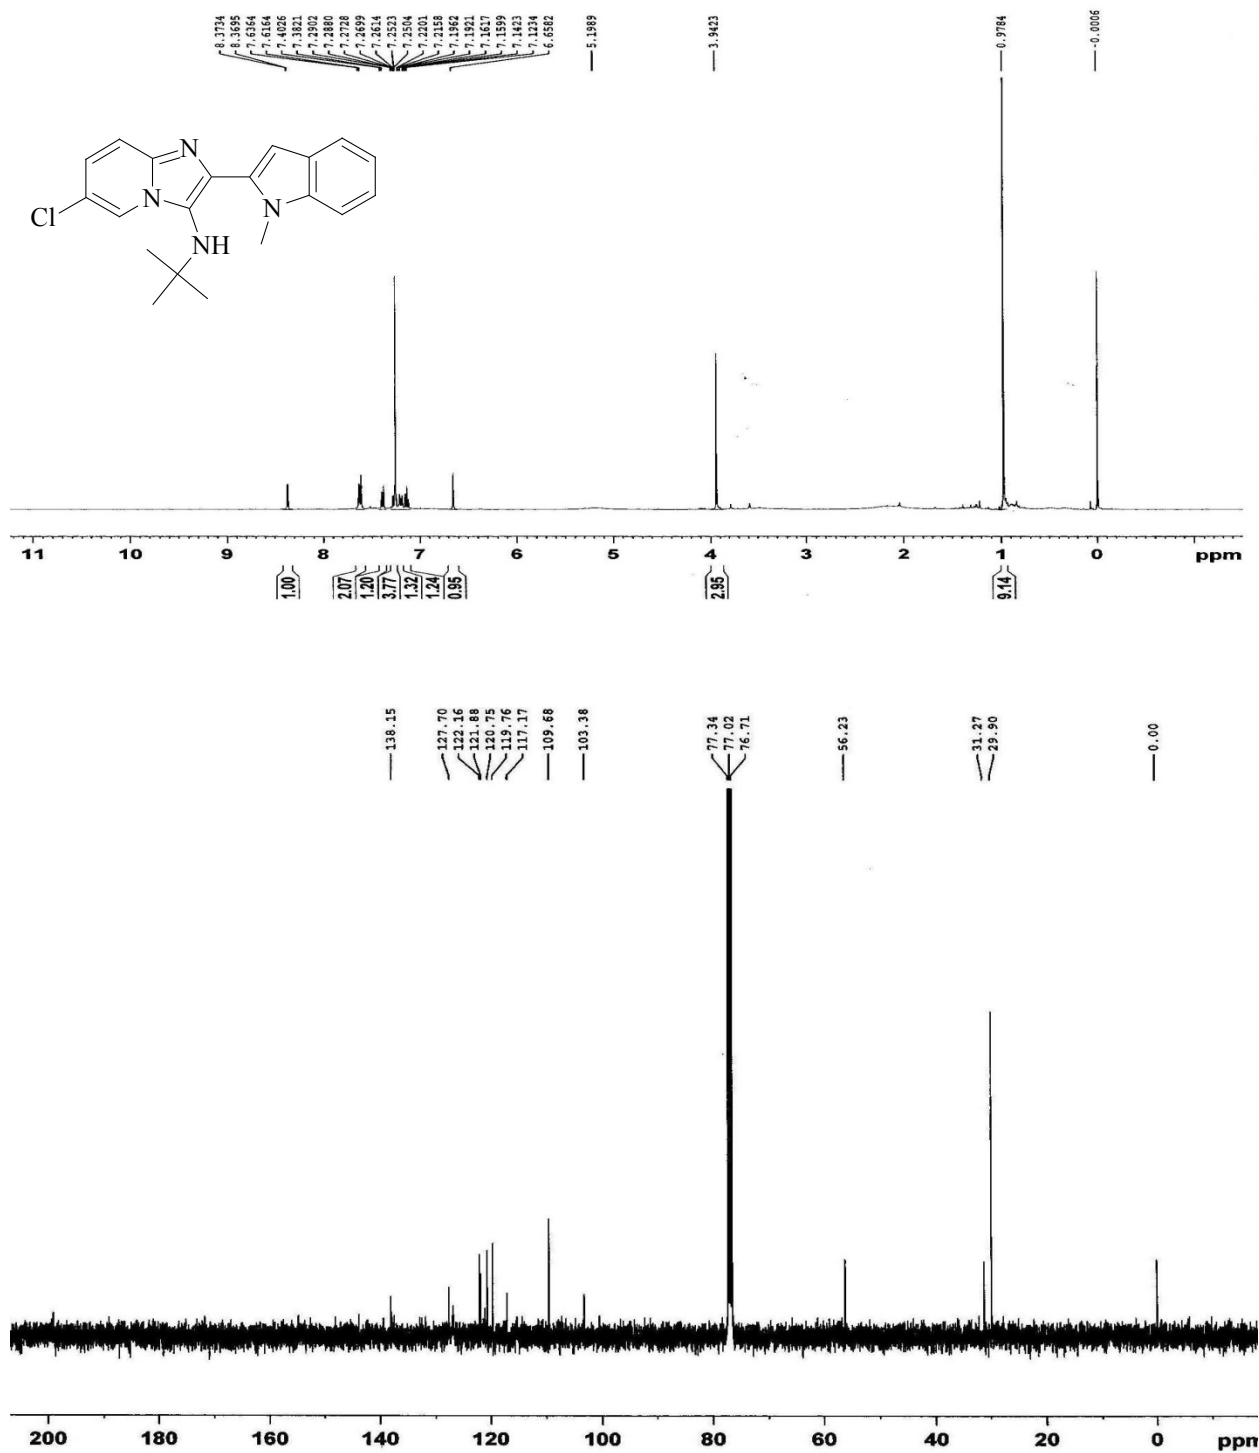

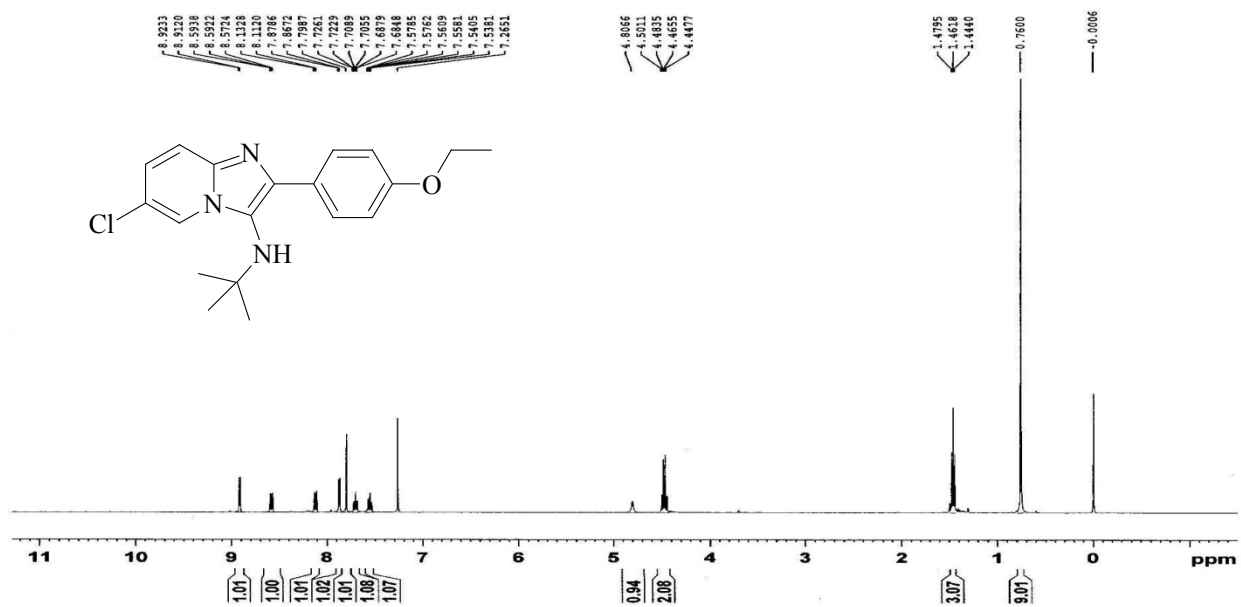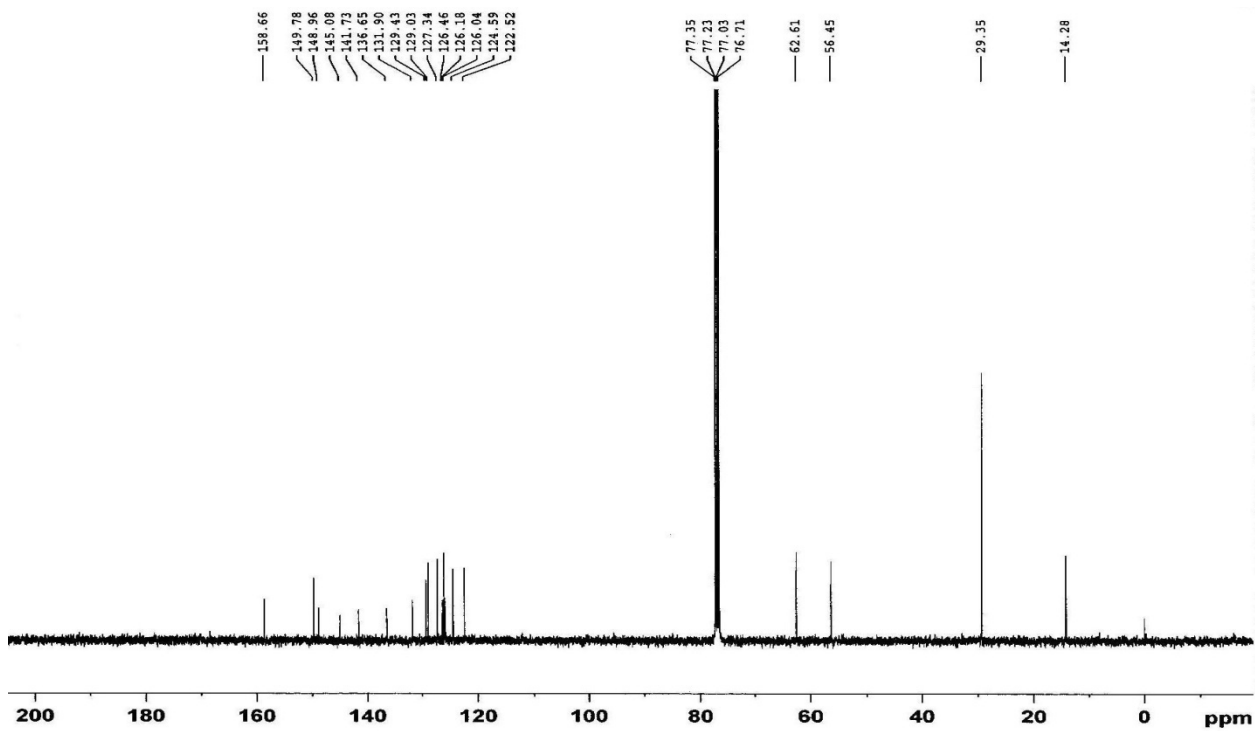

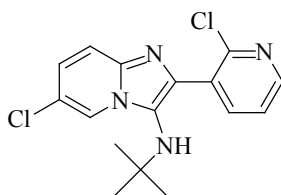

2: UV Detector: 220 Smooth (SG, 2x3)

1.13

Range: 1.167

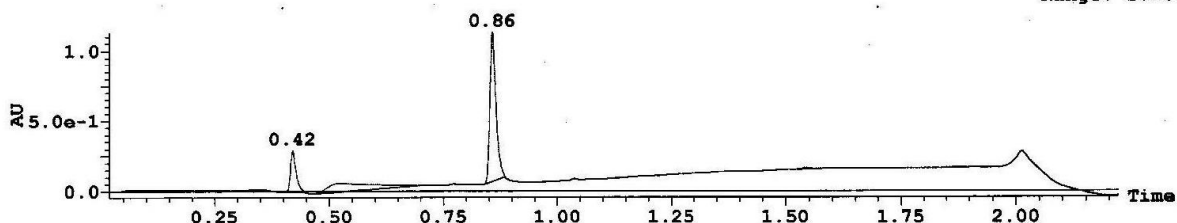

| Peak Number | Time | AreaAbs | Area %Total |
|-------------|------|---------|-------------|
| 1           | 0.42 | 4210    | 15.19       |
| 2           | 0.52 | 7001    | 25.26       |
| 3           | 0.86 | 16272   | 58.72       |
| 4           | 1.54 | 228     | 0.82        |

Peak ID 1 Time 0.42 Mass Found

1:MS ES+  
8.8e+003

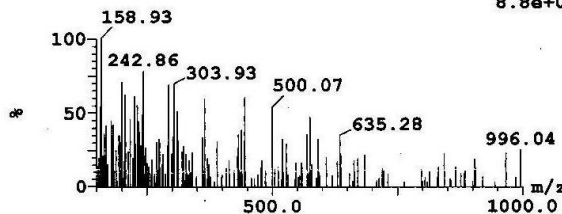

Peak ID 2 Time 0.52 Mass Found

1:MS ES+  
1.5e+005

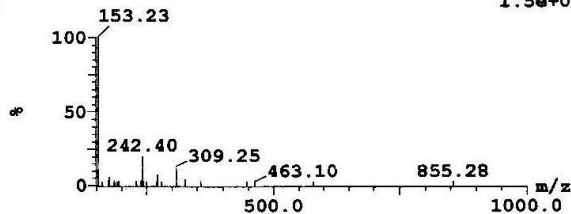

Peak ID 3 Time 0.86 Mass Found

1:MS ES+  
6.3e+006

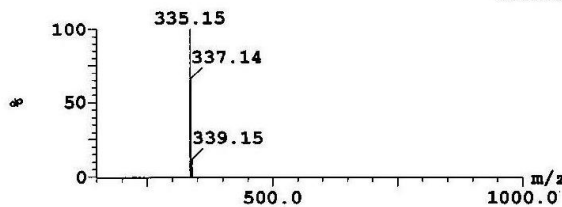

Peak ID 4 Time 1.54 Mass Found

1:MS ES+  
6.4e+005

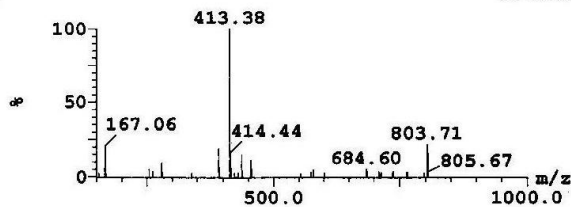

Mass spectrum of compound (2a)



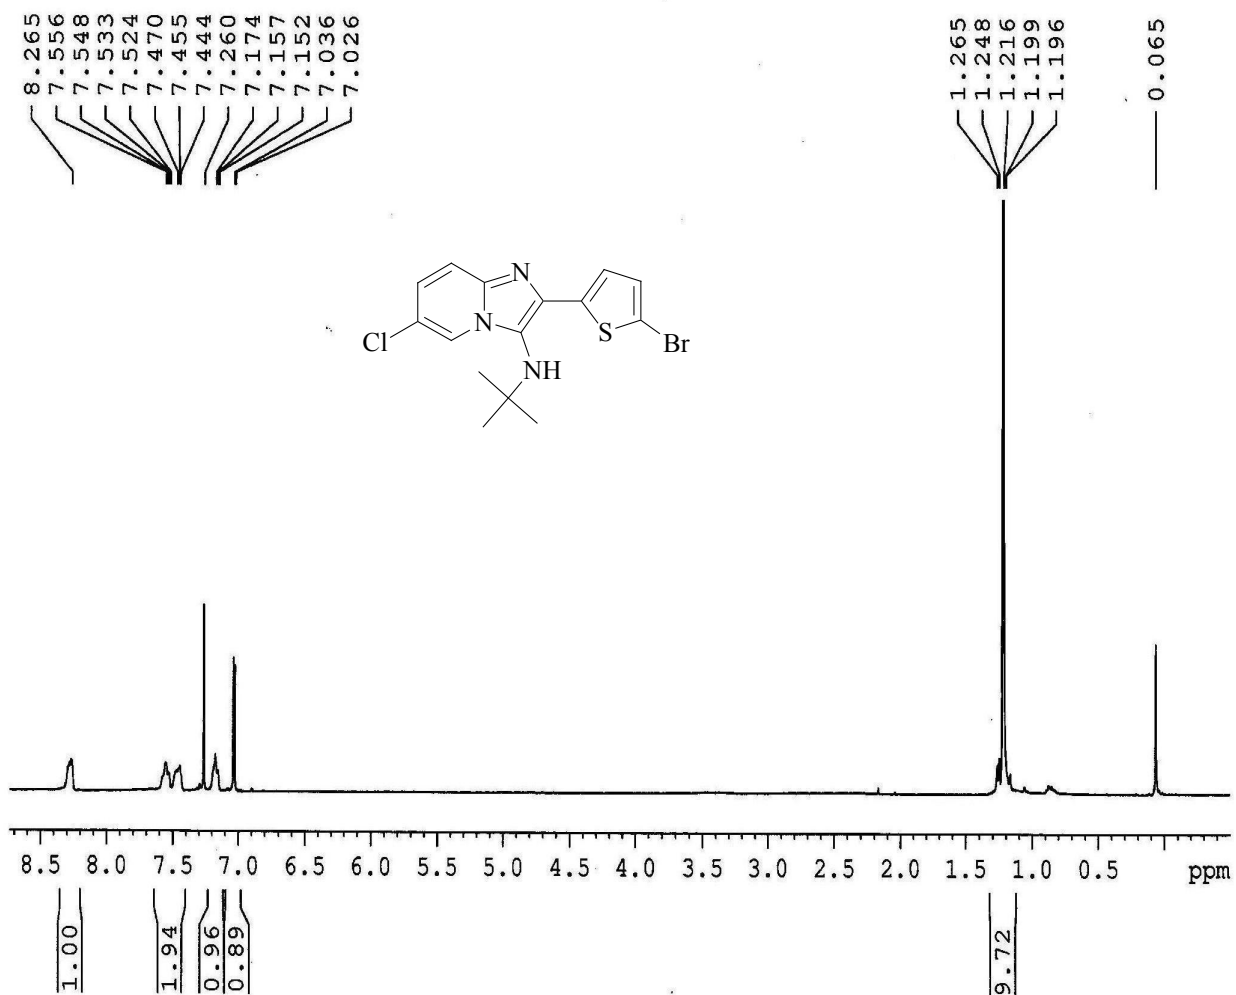

**D<sub>2</sub>O exchangeable for the compound (2e)**
